# Supplementary material for: Mayday sustains trans-synaptic BMP signaling required for synaptic maintenance with age
Source: eLife. 2021 Mar 5;10:e54932. doi: 10.7554/eLife.54932 (PMC7935490; doi:10.7554/eLife.54932)
Supplement: Figure 1—source data 1. [file elife-54932-fig1-data1.xlsx]

## Sheet: Figure 1-Raw Data 
WT Day 3	3PM71 Day 3	WT Day 25	3PM71 Day 25
87	87	90	58
86	85	85	56
86	85	83	45
84	84	83	44
84	84	83	42
84	83	81	38
84	82	81	38
83	82	80	34
83	82	80	30
83	82	79	23
83	81	78	23
83	81	78	21
82	81	78	10
82	80	77	6
82	80	77	3
81	79	77	3
81	79	77	3
81	78	77	0
81	78	75	0
81	78	75	0
80	77	75	0
80	77	75	0
80	77	74	0
79	77	74	0
79	76	73	0
79	76	73	0
79	76	73	0
79	76	71	0
79	75	71	0
79	74	71	0
78	74	70	0
78	74	70	0
77	73	69	0
77	73	69	0
77	73	69	0
77	73	68	0
77	73	68	0
76	72	68	0
76	72	68	0
76	71	67	0
76	70	67	0
75	70	67	0
75	69	66	0
75	69	66	0
75	68	65	0
74	66	65	0
71	66	65	0
67	63	65	0
62	63	65	0
62	63	64	0
60	62	64	0
41	54	64
	53	63
	43	63
		63
		61
		58
		58
		58
		58
		49
		44
		40
		32
		0
