# Supplementary material for: Mayday sustains trans-synaptic BMP signaling required for synaptic maintenance with age
Source: eLife. 2021 Mar 5;10:e54932. doi: 10.7554/eLife.54932 (PMC7935490; doi:10.7554/eLife.54932)
Supplement: Figure 2—source data 1. [file elife-54932-fig2-data1.xlsx]

## Sheet: Figure 2-Synaptic Morphology Da
Total Branch Length (µM)					Number of Branches					Bouton Number
WT Day 3 Total Branch Length (uM)	Myd3PM71 Day 3 Total Branch Length (uM)	WT Day 25 Total Branch Length (uM)	Myd3PM71 Day 25 Total Branch Length (uM)		WT Day 3	3PM71Day 3	WT Day 25	3PM71 Day 25		WT Day 3 Bouton Number	Myd3PM71Day 3 Bouton Number	WT Day 25 Bouton Number	Myd3PM71Day 25 Bouton Number
908.973	667.528	889.784	430.247		85	51	52	13		213	259	282	46
811.026	358.873	597.787	462.34		43	12	26	28		283	183	169	95
751.259	812.645	561.598	382.976		34	45	30	15		282	264	210	55
705.658	1111.68	470.985	142.037		55	55	34	7		242	364	206	9
711.774	614.57	616.907	761.011		33	38	25	23		280	254	231	59
594.268	847.491	716.704	265.043		68	78	44	11		210	306	224	55
620.173	518.592	339.921	387.473		30	30	19	18		253	190	150	51
609.284	724.23	766.106	394.961		44	51	39	25		230	259	318	37
503.336	477.727	906.723	294.443		42	22	57	10		178	172	287	78
646.628	882.356	741.012	395.786		30	45	38	18		239	254	257	62
566.29	904.69	731.742	271.974		24	48	35	12		255	296	225	42
666.302	593.907	668.44	406.008		39	22	48	18		220	189	240	113
483.002	381.428	523.38	436.448		25	29	20	19		225	146	147	107
435.658	736.974	546.371	57.254		23	50	32	2		144	220	173	10
539.727	787.613	638.347	264.748		48	33	35	14		236	236	213	45
1110.79	491.211	611.618	393.361		67	17	36	18		367	174	162	64
925.172	603.311	1295.39	315.796		72	43	112	11		265	167	315	41
880.746	555.726	614.078	475.336		49	32	40	20		288	247	176	60
606.47	916.218	732.572	347.112		37	40	36	15		256	337	229	61
704.192	689.102	649.853	355.65		42	31	41	9		169	176	191	39
