# Supplementary material for: Mayday sustains trans-synaptic BMP signaling required for synaptic maintenance with age
Source: eLife. 2021 Mar 5;10:e54932. doi: 10.7554/eLife.54932 (PMC7935490; doi:10.7554/eLife.54932)
Supplement: Figure 3—source data 1. [file elife-54932-fig3-data1.xlsx]

## Sheet: Figure 3 Gene Characterization
Figure 3 Panel A Raw Data						Figure 3 Panel B Raw Data
WT	3PM71/+	3PM71/3PM71	DF/+	DF/3PM71		CG31475Mi08258/+	CG31475Mi08258/3PM71	CG31475Mi08258/DF ED 5938	CG31475Mi08666/+	CG31475Mi08666/3PM71	CG31475Mi08666/DF ED 5938	CG31475MB03509/+	CG31475MB03509/3PM71	CG31475MB03509/DF ED 5938
90	83	82	87	81		90	86	0	87	81	87	86	78	78
85	81	80	87	74		90	83	0	82	80	83	85	76	66
84	81	62	86	65		83	80	0	81	79	82	85	76	61
84	80	57	85	65		80	80	0	81	78	81	83	75	59
84	80	55	85	59		80	79	0	79	76	79	83	75	56
84	80	54	84	56		80	79	0	79	75	78	83	75	51
83	80	50	84	54		80	78	0	79	75	71	82	75	49
82	80	47	84	53		79	78	0	79	74	70	82	75	49
82	78	47	83	53		79	77	77	79	71	70	80	75	47
82	78	44	83	49		78	77	76	79	71	70	80	75	46
81	77	43	82	42		78	77	64	79	67	69	80	71	44
81	77	41	82	42		76	76	53	78	67	69	80	70	38
81	77	40	82	42		75	76	50	77	67	68	80	70	35
81	76	40	82	40		74	76	0	77	65	68	80	70	33
80	76	36	81	40		74	76	0	77	65	68	79	70	29
80	76	29	81	33		74	75	79	77	64	65	79	69	29
80	76	27	81	24		74	75	70	77	64	65	79	68	27
80	76	26	81	17		74	75	56	77	63	64	79	68	20
80	76	26	81	12		73	75	0	77	58	61	79	67	8
80	76	26	80	0		73	75	0	75	58	60	79	63	5
79	75	23	80	0		73	75	0	75	57	60	79	63	4
79	75	23	80	0		73	74	0	75	56	59	79	63	0
79	75	17	79	0		73	74	0	74	53	58	79	63	0
79	75	15	79	0		73	74	0	74	51	57	78	62	0
78	75	15	79	0		73	73	0	74	50	55	78	62	0
78	74	13	79	0		72	72	73	74	41	55	78	62	0
78	73	5	79	0		72	72	67	74	37	54	78	61	0
78	73	0	78	0		72	72	65	74	0	52	78	61	0
78	73	0	78	0		72	72	65	74	0	52	78	61	0
77	73	0	78	0		71	72	61	74	0	49	77	60	0
77	73	0	78	0		71	69	61	74	0	49	77	60	0
77	73	0	78	0		71	69	56	73	0	48	77	60	0
77	73	0	78	0		71	69	39	73	0	47	77	60	0
76	72	0	78	0		71	69	28	73	81	47	77	60	0
76	72	0	77	0		71	69	25	73	80	47	77	60	0
76	72	0	77	0		71	68	16	72	79	46	77	59	0
76	72	0	77	0		70	68	0	72	77	46	77	57	0
76	72	0	76	0		70	68	0	72	77	45	77	54	0
76	72	0	76	0		70	67	0	72	73	45	77	54	0
76	72	0	76	0		70	67	0	72	72	42	77	54	0
76	72	0	76	0		70	66	0	72	70	42	76	54	0
76	72	0	76	0		70	65	0	72	69	42	76	52	0
76	72	0	76	0		70	65	0	71	69	42	76	49	0
75	72	0	76	0		70	65	0	71	68	41	76	49	0
75	71	0	76	0		70	64	0	71	67	40	76	49	0
75	71	0	76	0		69	64	80	71	67	37	76	48	0
75	71	0	76	0		69	64	71	71	67	37	76	47	0
74	70	0	76	0		69	63	70	71	66	37	76	47	0
74	70	0	75	0		69	62	70	71	65	35	76	46	0
74	70	0	74	0		69	62	66	71	64	33	76	44	0
74	70	0	74	53		68	61	65	70	64	32	75	44	0
74	70	0	73	50		68	60	63	70	63	32	75	44	0
74	70	0	73	49		68	60	63	69	58	32	75	44	0
74	70	0	73	47		68	59	63	69	57	30	75	42	0
74	70	0	73	46		68	59	60	65	53	30	75	40	0
74	69	0	73	41		68	59	56	65	52	29	75	39	0
73	69	0	72	20		67	59	45	65	51	27	74	38	0
73	68	0	72	20		67	58	36	65	48	27	74	38	0
73	68	0	71	16		67	57	32	65	42	27	74	38	0
73	67	0	70	14		67	57	0	63	40	19	74	37	0
73	67	0	70	76		67	54	0	63	38	15	74	36	0
72	67	0	70	58		65	53	0	63	38	15	73	31	0
72	67	0	70	48		65	53	0	63	38	15	73	30	0
72	66	0	70	36		65	50	0	63	36	14	73	28	0
72	65	0	70	0		65	34	0	63	36	14	73	26	0
72	65	0	70	0		65	0	0	63	30	0	73	26	0
72	65	0	70	0		65	83	0	59	29	0	73	21	0
72	65	0	70	0		65	81	0	59	29	0	73	0	0
71	64	0	70	0		64	81	0	59	27	0	72	0	0
71	64	0	69	0		64	81	0	59	26	0	72	0	0
71	64	0	69	0		64	79	0	59	21	0	71	0	0
71	64	0	69	0		63	77	0	58	17	0	71	0	0
71	64	0	69	0		63	77	0	58	15	0	71	0
71	64	0	68			63	77	60	57	14	0	71	0
70	63	0	68			63	76	50	53	14	0	71	0
70	63	0	67			63	75	37	52	13	0	71	0
70	63	0	67			61	74	17	52	7	0	71	0
70	63		66			61	72	13	52	0	0	71	0
70	62		64			60	71		47	0	0	70	0
70	62		64			60	71		45	0	0	70	0
69	62		64			60	71		40	0	0	70	0
69	62		64			57	71			0	0	70	0
69	62		64			57	69			0	0	70	0
68	61		64			57	69			0	0	69	0
68	61		64			57	69			0	0	69	0
68	61		63			54	69			0	0	69	0
68	61		63			54	68			0	0	69	0
68	60		63			48	68			0	0	69	0
67	60		63			46	68			0	0	69	0
67	60		63			43	67			0	0	69	0
67	60		63			40	67			0	0	69	0
67	59		62			0	67			0	0	67	0
67	59		60				67			0	0	67	0
66	59		56				64			0	0	67	0
66	58		56				64			0	0	67	0
66	58		54				64			0	0	67	0
66	58		54				64			0	0	67	0
65	58		52				64			0	0	67	0
65	57		48				64			0	0	66	0
65	56		44				64			0	0	66	0
65	56		42				64			0	0	64	0
65	55		40				64			0	0	64
64	55		33				62			0	0	64
64	54		15				62			0	0	64
64	53		0				62			0	0	64
64	49		0				62			0	0	64
63	38		0				62			0	0	64
63	15		0				61			0	0	64
63			0				59				0	64
63			0				59				0	64
63			0				59				0	64
63			0				58				0	64
62			0				58				0	63
62							58				0	60
62							58				0	60
62							58				0	60
61							58				0	58
61							58				0	57
61							57				0	57
60							56				0	57
60							56				0	57
60							56				0	57
60							56				0	57
60							54				0	57
59							54				0	57
59							54				0	55
59							54				0	53
59							54				0	51
59							53				0	51
59							52				0	51
59							52				0	50
58							52				0	49
57							49				0	49
57							47				0	40
55							46				0	28
54							45				0	17
54							41				0	0
52							39				0
50							36				0
50							0				0
49											0
47											0
45											0
43											0
15											0
10											0
1											0
0											0
0											0
											0
											0
											0
											0
											0
											0
											0
