# Supplementary material for: Mayday sustains trans-synaptic BMP signaling required for synaptic maintenance with age
Source: eLife. 2021 Mar 5;10:e54932. doi: 10.7554/eLife.54932 (PMC7935490; doi:10.7554/eLife.54932)
Supplement: Figure 3—source data 2. [file elife-54932-fig3-data2.xlsx]

## Sheet: S1. qPCR
	Averge ▲ CtMutant	Average ▲ Ct WT	(Mutant ▲ Ct-WT▲Ct)	Fold Change in 3PM71 Expression
Genotype Comparison to WT			▲▲ CT	2^(-▲▲Ct)
3PM71 (-/-)	5.99063	2.86	3.13063	0.114179
3PM71/Df ED 5938	6.2774	2.86	3.4174	0.0935966
CG31475MI08252/Df Ed 5938	5.32073	2.86	2.46073	0.18
Cg31475MI08666/Df ED 5938	7.04563	2.86	4.18562	0.0549543
CG31475MB03509/Df Ed 5938	4.83097	2.86	1.97097	0.26
