# Supplementary material for: Mayday sustains trans-synaptic BMP signaling required for synaptic maintenance with age
Source: eLife. 2021 Mar 5;10:e54932. doi: 10.7554/eLife.54932 (PMC7935490; doi:10.7554/eLife.54932)
Supplement: Figure 4—figure supplement 1—source data 1. [file elife-54932-fig4-figsupp1-data1.xlsx]

## Sheet: S2. RNAi Rescue 
S2. MydRNAi Rescue Flight Data
MHC-Gal4 >MydRNAi	MHC-Gal4 > MydRNAi, luciferase	MHC-Gal4 >MydRNAi,venus::myd
79	81	90
79	78	90
78	78	90
76	77	83
75	77	81
75	77	80
72	77	80
72	76	80
72	74	80
71	72	80
71	72	78
71	71	78
70	71	78
69	62	77
67	58	77
67	36	77
66	33	75
64	31	74
63	10	74
63	8	74
61	0	73
59	0	73
59	0	73
50	0	73
50	0	73
49	0	72
49	0	72
49	0	71
45	0	70
45		70
41		70
41		70
21		70
21		70
13		70
12		68
0		68
0		68
0		68
0		67
0		67
0		67
0		66
0		66
0		65
0		65
0		65
		64
		61
		56
		52
		52
		51
		50
		29
		27
		0
		0
		0
		0
		0
		0
		0
