# Supplementary material for: Mayday sustains trans-synaptic BMP signaling required for synaptic maintenance with age
Source: eLife. 2021 Mar 5;10:e54932. doi: 10.7554/eLife.54932 (PMC7935490; doi:10.7554/eLife.54932)
Supplement: Figure 4—figure supplement 3—source data 1. [file elife-54932-fig4-figsupp3-data1.xlsx]

## Sheet: S4. TsGal80 MydRNAi
Panel A: TsGal80 Ubiquitious Knockdown Flight Data					Panel B: TsGal80 Muscle Knockdown Flight Data
TsGal80-Tubulin-Gal4 /+ Day 3	TsGal80-Tubulin-Gal4 > MydRNAi w/Dicer 2 Day 3	TsGal80-Tubulin-Gal4 /+ Dy 28	TsGal80-Tubulin-Gal4 > MydRNAi w/Dicer 2 Day 28		TsGal80,MHC-Gal4 /+ Day 3	UAS- MydRNAi , Dicer 2/+ Day 3	TsGal80-MHC-Gal4 > MydRNAi , Dicer 2 (Day 3)		TsGal80, MHC-Gal4 /+ Day 28	MydRNAi w, Dicer 2/+ Day 28	TsGal80, MHC-Gal4> MydRNAi,Dicer 2 Day 28
88	90	83	68		90	90	81		85	90	83
88	83	82	63		83	90	80		83	90	82
87	83	79	62		83	90	80		82	87	71
84	82	79	61		83	88	76		80	82	69
84	82	78	60		80	87	74		80	82	69
84	81	78	58		80	86	73		78	81	63
83	78	75	55		80	86	73		78	81	63
82	78	73	55		80	84	73		78	80	57
82	78	73	49		80	83	71		75	79	51
81	76	72	49		79	83	71		75	79	50
81	76	70	44		79	82	70		75	79	50
81	76	69	40		77	81	69		75	77	49
81	76	67	40		77	81	69		75	77	44
80	75	67	37		77	81	68		73	76	44
79	74	65	33		76	80	65		71	75	38
79	74	64	32		76	80	65		71	75	29
79	73	63	29		76	80	56		69	75	26
79	73	63	29		76	79	56		69	74	25
78	73	63	27		76	79	50		69	73	22
77	72	60	24		75	79	44		61	73	20
75	72	56	22		74	79	90		59	72	20
90	72	55	22		74	78	84		59	72	17
88	72	55	20		74	78	80		59	71	15
84	71	55	7		74	78	80		57	71	13
82	71	47	0		73	77	76		57	67	12
82	71	43	0		73	75	76		57	67	8
82	71	43	0		72	72	76		56	66	8
82	71		0		72	72	76		56	65	0
81	70		0		72	72	76		54	65	0
	70		0		72	72	74		37	64	0
	70		0		71	71	71		0	64	0
	70		0		71	70	71		0	62	0
	70		0		69	69	71		82	59	0
	70		0		68	69	70		81	52	0
	69		0		68	68	69		77	52	0
	69		0		68	66	66		77	49	0
	69		0		68	65	66		77	11	0
	68		0		67	64	64		67	0	0
	68		0		67	64	64		61		0
	67		0		67	59	63		56		0
	67		0		67	58			53		0
	65				67	50			45		0
	65				67				0		0
	65				64						0
	64				61						0
	64				61						0
	63				61						0
	61				61						0
	59				59						0
	59				59						0
					56						0
					52						0
					41						0
											0
											0
											0
											0
											0
