# Supplementary material for: Mayday sustains trans-synaptic BMP signaling required for synaptic maintenance with age
Source: eLife. 2021 Mar 5;10:e54932. doi: 10.7554/eLife.54932 (PMC7935490; doi:10.7554/eLife.54932)
Supplement: Figure 4—source data 1. [file elife-54932-fig4-data1.xlsx]

## Sheet: Figure 4 RNAi Raw data
UAS-CG31475ir; UAS DICER 2; /+ (Oregon R) Day3	UAS-CG31475ir; UAS DICER 2; /+ (Oregon R) Day14	UAS-CG31475ir; UAS DICER 2; /+ (Oregon R) Day21		Tubulin Gal4/+ (3)	Tubulin Gal4/+ (14)	Tubulin Gal4/+ (21)		Tub-Gal4> MaydayRNAi (Day 3)	Tub-Gal4> MaydayRNAi (Day 14)	Tub-Gal4> MaydayRNAi (Day 21)		Elav-Gal4/+ (Day3)	Elav-Gal4/+ (Day14)	Elav-Gal4/+ (Day 21)		Elav-Gal4 Myd RNAi Day 3	Elav-Gal4 Myd RNAi Day 14	Elav-Gal4 Myd RNAi Day 21		Ok371-Gal4/+ (Day 3)	Ok371-Gal4/+ (Day 14)	Ok371-Gal4/+ (Day 21)		oK371-Gal4 > UAS-MaydayRNAI (Day 3)	oK371-Gal4 > UAS-MaydayRNAI (Day 14)	oK371-Gal4 > UAS-MaydayRNAI (Day 21)		Repo-Gal4/+ (Day 3)	Repo-Gal4/+ (Day 14)	Repo-Gal4/+ (Day 21)		Repo-Gal 4 MayDay RNai Day 3	Repo-Gal 4 MayDay RNai Day 14	Repo-Gal 4 MayDay RNai Day 21		MHC-Gal4/+(Day 3)	MHC-Gal4/+ (Day 14)	MHC-Gal4/+(Day 21)		mhc-Gal4 > Mayday RNAi Day3	mhc-Gal4 > Mayday RNAi Day14	mhc-Gal4 > Mayday RNAi Day21
90	89	88		88	82	84		Lethal	Lethal	Lethal		90	89	90		87	90	90		90	83	90		90	85	86		90	88	86		90	85	88		86	82	90		90	0	82
90	87	86		86	82	83						90	83	90		85	90	90		90	81	87		90	85	86		90	87	86		90	85	87		84	82	90		85	0	81
90	87	81		84	81	79						90	82	87		85	85	86		87	81	87		90	83	84		90	86	86		90	83	87		84	79	86		84	0	81
88	86	80		83	81	79						90	82	84		85	85	86		84	78	85		87	83	84		85	83	84		88	82	86		82	77	83		80	0	80
87	86	79		82	80	79						87	82	83		83	85	84		83	78	83		86	81	83		85	83	84		84	82	86		80	72	82		80	0	77
86	84	78		82	79	78						85	80	82		83	84	84		80	78	83		86	81	81		83	82	83		84	81	85		80	72	81		80	86	76
84	84	77		79	78	78						84	80	82		83	84	81		80	78	83		84	79	81		83	82	83		84	80	85		78	72	81		77	84	76
84	84	73		79	77	78						83	80	81		81	83	81		80	77	79		82	77	79		83	81	82		83	80	84		78	72	79		75	76	75
84	83	70		78	77	78						82	80	81		81	82	81		80	77	79		82	77	78		83	81	82		83	80	83		78	70	79		75	67	75
84	83	67		78	76	76						82	80	81		81	82	81		80	77	78		81	77	78		82	79	82		83	80	83		78	69	79		74	67	74
84	83	67		78	75	76						81	80	80		80	81	81		80	76	78		81	77	77		82	79	79		83	79	83		77	69	77		74	65	72
84	83	60		77	74	76						81	79	80		80	81	80		80	76	78		81	77	77		82	78	78		82	79	82		77	69	77		73	63	69
83	83	86		77	74	76						81	78	79		79	81	80		80	76	78		80	77	77		81	78	78		80	79	82		77	67	76		71	60	69
82	83	85		77	70	76						81	78	79		79	81	80		79	75	78		80	77	77		81	78	77		80	79	82		76	67	76		71	60	67
82	83	85		77	70	75						80	78	78		79	81	79		79	75	77		80	77	77		81	78	76		80	78	82		74	67	76		70	60	67
81	82	85		77	70	75						79	77	78		79	81	78		79	75	77		79	76	77		81	77	76		80	77	82		74	67	76		70	60	67
81	82	83		77	70	75						79	77	78		78	81	78		77	75	77		79	76	77		80	77	76		80	76	82		74	66	74		70	60	65
81	81	83		77	70	75						79	77	78		78	81	78		77	74	76		78	75	75		80	77	76		80	76	82		74	64	74		70	60	63
81	81	82		76	69	74						78	77	78		77	81	78		77	74	76		77	75	75		80	76	76		80	76	82		72	63	74		69	57	63
81	80	80		76	69	73						78	76	77		77	81	78		77	74	76		77	75	75		80	75	74		79	76	81		72	61	73		69	55	63
81	80	80		76	67	73						78	76	77		76	81	77		77	74	74		77	74	75		80	75	74		79	76	81		71	60	73		68	54	62
80	80	79		75	67	73						78	76	77		76	80	77		77	74	74		77	74	73		79	74	74		78	76	81		71	59	72		68	52	60
80	80	79		75	67	73						78	76	77		76	80	77		77	73	74		76	74	73		79	72	74		78	74	81		70	86	71		68	51	59
80	79	79		74	66	73						78	75	77		76	80	77		76	72	73		76	73	73		79	72	74		78	74	81		70	79	71		67	50	59
80	79	79		73	66	73						76	75	77		76	80	77		76	71	73		75	73	73		79	71	72		78	73	81		70	78	71		67	50	56
80	79	79		72	66	72						76	75	76		76	79	76		75	70	73		75	72	71		78	70	72		78	73	81		69	78	71		67	50	56
80	79	79		71	64	71						76	75	76		76	79	76		75	68	73		75	72	71		78	70	72		78	73	80		68	76	71		67	49	55
80	78	78		71	64	71						76	75	76		75	79	76		75	68	71		75	72	71		78	69	69		78	73	79		68	76	71		67	46	53
79	78	78		71	64	71						76	74	76		75	79	76		75	67	71		75	72	71		78	68	69		78	73	79		68	72	71		66	0	53
79	78	78		71	61	71						76	74	76		74	78	76		74	64	71		74	72	71		78	67	69		78	73	79		68	72	70		66	0	53
79	77	77		70	61	71						76	74	75		74	77	76		74	60	71		74	72	70		78	66	66		77	72	79		68	71	70		65	0	53
78	77	77		69	60	69						76	74	75		74	77	75		74	59	71		72	72	70		78	65	65		76	72	79		66	69	70		65	0	52
78	77	77		69	59	69						75	74	75		74	77	75		74	59	70		72	71	70		78	59	65		76	72	79		65	66	69		65	0	51
78	77	76		69	57	69						74	74	75		73	77	75		74	58	69		72	71	70		78	56	63		76	72	79		64	66	69		65	0	49
78	72	75		68	57	69						74	74	73		72	76	74		74	58	67		71	70	69		78	50	15		74	72	78		64	66	69		65	0	48
78	71	75		68	55	69						74	74	73		72	76	74		74	58	67		71	70	68		78	34	15		73	72	78		63	52	69		63	0	45
78	71	75		68	51	69						73	74	73		72	76	74		73	58	67		71	69	67		78	0	0		73	71	78		63	49	69		63	0	44
78	71	74		66	51	67						73	72	73		72	76	73		73	36	66		71	69	67		77				73	71	78		63	46	69		63	0	42
78	70	72		66	50	67						72	72	73		72	76	73		73	34	66		70	69	66		77				72	71	78		63		69		60	0	39
78	67	71		65	49	65						71	72	72		70	76	73		73	22	66		70	69	66		77				67	71	78		62		68		59	0	38
77	37	70		64	0	65						65	71	72		69	75	72		73		66		70	69	66		76				67	71	78		62		68		59	0	37
77		69		64	0	65						0	71	72		68	75	71		73		66		70	69	65		76				61	68	78		58		68		59	68	35
76		69		63		65							70	72		68	75	71		72		64		69	69	65		76				58	68	78		57		68		59	67	33
76		68		63		64							70	72		68	75	71		72		64		68	69	64		75				54	68	77		57		68		58	65	33
76		66		63		64							70	71		68	75	71		72		64		68	68	63		75				0	68	77		41		68		57	64	29
76		90		62		64							70	70		68	74	71		72		63		67	68	63		75					66	77		2		68		56	60	29
76		87		60		63							70	70		67	74	71		72		63		67	66	62		75					66	77				67		56	60	27
76		86		59		60							70	70		67	74	71		71		63		66	66	62		75					66	77				67		55	58	23
76		84		58		60							69	70		67	74	70		71		63		64	66	61		72					66	77				67		54	58	22
76		84		58		60							68	70		66	73	69		71		63		64	66	59		72					65	77				67		53	57	18
76		84		58		60							68	70		65	73	69		71		62		62	66	58		71					64	77				66		53	57	18
76		83		57		60							66	69		65	73	69		71		62		60	66	58		71					63	77				66		53	51	17
76		81		56		59							66	69		62	73	68		71		59		57	65	52		70					61	77				65		53	49	0
75		76		53		56							66	69		62	73	68		70		59		52	65			68					59	77				65		52	48	0
75		76		52		52							66	69		62	73	68		70		59		51	64			68					57	77				65		52	45	0
75		76		52		52							65	69		60	72	68		69		57		19	63			68					55	77				65		52	45	0
75		76		46		48							65	68		58	72	68		69		56			61			68					51	77				65		51	37	0
75		76		42									65	68		57	72	68		69		53			61			68					43	76				64		49	32	0
75		76		0									65	67		46	72	68		69		47			57			68						76				63		49	29	0
75		76		0									65	67			72	68		69					51			68						76				63		49	23	0
75		75											63	67			72	67		69					51			68						76				63		48	21	0
75		75											63	66			71	67		69								67						76				63		43	18	0
75		73											62	66			71	67		69								65						76				62		41	15	0
74		73											62	66			71	66		68								65						76				61		41		0
74		71											62	66			71	66		68								63						76				60		41		0
74		71											61	65			71	66		68								61						76				59		0		0
74		70											61	65			70	66		67								60						75				59		0		0
74		68											60	65			70	66		67								58						75				57		0		0
74		67											58	65			70	66		67								57						75				57		0		0
72		66											55	65			70	65		67														75				57		0		0
72		65											13	64			68	65		67														75				57				0
72		64											0	64			68	65		67														75				55				0
72		62												63			68	65		67														75				54				0
72		62												63			68	64		67														75				52				0
71		61												63			67	63		67														74				47				0
70		59												63			67	63		66														74				46				0
67		56												62			66	62		66														74				41				0
66		54												61			66	62		66														74				33				0
65		47												60			66	62		66														73				21				0
65		44												60			66	61		66														72				18				0
63		24												59			66	61		66														72				0				0
61		5												59			66	61		65														72				0				0
58		86												57			65	61		65														72								0
57		86												56			65	61		65														71								0
25		78												52			64	61		65														71								0
		77												49			63	59		64														71								0
		77															61	58		64														71								0
		76															61	56		64														71								0
		75															61	56		64														71								0
		75															59	56		63														70								0
		74															57	53		63														69								0
		74															55	52		63														69								0
		74															51	52		63														69								0
		68															43	50		62														69								0
		67															13	37		62														68								0
		64																33		62														67								0
		60																		62														66
		13																		62														66
		0																		62														66
		86																		61														64
		83																		61														62
		82																		61														59
		81																		59														50
		80																		58
		79																		55
		79																		54
		79																		28
		77																		0
		76
		74
		71
		70
		66
		64
		90
		90
		57
		65
		69
		73
		73
		73
		75
		75
		75
		75
		79
		79
		79
		81
		81
		81
		83
		83
		85
