# Supplementary material for: Mayday sustains trans-synaptic BMP signaling required for synaptic maintenance with age
Source: eLife. 2021 Mar 5;10:e54932. doi: 10.7554/eLife.54932 (PMC7935490; doi:10.7554/eLife.54932)
Supplement: Figure 5—source data 1. [file elife-54932-fig5-data1.xlsx]

## Sheet: Figure 5 Myd Rescue
Figure 5: Myd Venus Rescue Flight Data						Total Branch Length (µM)						Number of Branches						Bouton Number
WT	Myd3PM71 (-/-)	Tub-Gal4 > uas-myd::venus, Myd3PM71 (-/-)	MHC-Gal4 > UAS-Myd::Venus; Myd3PM71 (-/-)	Ok371-Gal4 & MHC-Gal4 >venus::myd; Myd3PM71 (-/-)		WT	Tub-Gal4 > uas-myd::venus, Myd3PM71 (-/-)	MHC-Gal4 > UAS-Myd::Venus; Myd3PM71 (-/-)	Ok371-Gal4 & MHC-Gal4 >venus::myd; Myd3PM71 (-/-)	Myd3PM71		WT	Tub-Gal4 > uas-myd::venus, Myd3PM71 (-/-)	MHC-Gal4 > UAS-Myd::Venus; Myd3PM71 (-/-)	Ok371-Gal4 & MHC-Gal4 >venus::myd; Myd3PM71 (-/-)	Myd3PM71		WT	Tub-Gal4 > uas-myd::venus, Myd3PM71 (-/-)	MHC-Gal4 > UAS-Myd::Venus; Myd3PM71 (-/-)	Ok371-Gal4 & MHC-Gal4 >venus::myd; Myd3PM71 (-/-)	Myd3PM71
89	77	78	83	83		612.487	757.738	1832.55	1705.92	295.89		51	54	208	179	9		206	202	104	298	50
88	65	77	83	79		506.273	1556.31	1196.27	2903.06	403.28		37	225	110	361	23		207	269	76	376	79
87	65	77	81	77		402.361	689.136	782.63	2327.44	465.67		26	64	69	270	19		114	162	89	358	65
86	43	76	80	76		473.728	779.349	1108.55	1492.77	449.91		59	98	146	118	20		165	139	66	198	51
84	43	73	78	76		535.49	790.465	985.03	2151.86	441.32		32	60	83	196	28		182	111	40	274	50
84	42	71	78	74		452.279	1239.09	1208.16	1227.23	438.7		33	142	152	63	20		160	168	100	144	36
81	42	71	76	74		463.44	761.067	377.61	2040.93	228.08		35	63	35	252	8		188	91	30	353	21
81	40	71	71	73		430.364	1111.97	1473.42	1896.76	361.68		32	115	149	175	28		120	248	118	284	51
80	36	69	67	72		482.237	1250.82	1434.41	1769.47	160.24		27	130	188	218	10		187	253	139	336	23
80	34	69	67	71		544.918	1181.75	1271.1	2513.34	549.52		51	131	138	298	29		153	236	99	318	32
80	11	69	65	71		415.672	769.455	435.53	1734.08	271.88		40	65	21	118	15		125	210	24	196	19
79	10	68	61	69		678.198	861.923	1282.1	1949.06	208.86		44	76	161	148	10		193	143	145	350	11
79	0	62	56	69		480.673	696.492	1090.57	1308.07	383.59		47	58	123	76	15		133	173	52	185	31
78	0	59	54	68		530.503	1643.14	1328.22	1518.66	258.15		47	163	123	131	10		169	248	130	278	21
78	0	57	54	67		780.767	983.662	1424.71	2422.11	268.3		60	103	171	285	9		203	151	126	408	26
77	0	57	48	67		424.855	707.62	564.3	1570.7	152.78		24	77	44	172	7		116	145	43	271	18
77	0	54	43	65		518.434	1007.95	500.78	2222.81	50.32		38	108	31	265	3		168	131	34	342	4
76	0	51	42	65		445.101	963.542	264.91	2240.54	171.35		21	91	15	251	5		99	133	9	371	25
76	0	81	36	63		690.954	588.53	1740.27	2232.52	229.64		53	42	208	200	9		162	127	175	233	32
75	0	78	34	63		631.484	918.572	1335.48	1821.3	136.37		43	100	146	183	6		200	229	138	274	13
75	0	77	29	60
75	0	71	25	59
75	0	71	23	59
75	0	69	13	57
75	0	69	4	57
73	0	66	0	55
72	0	64	0	48
72	0	57	0	43
72	0	54	0	41
72	0	54	0	32
72	0	51	0	26
72	0	51	0
71	0	44	0
71	0	38	0
71	0		0
71	0		0
71			0
71			0
71			0
70			0
70			0
70			0
70			0
70			0
69			0
69			0
69			0
69			0
69			0
68			0
68			0
68			0
68			0
67			0
67			0
67			0
67			0
67			0
66			0
66			0
65			0
65			0
64			0
64			0
63			0
61
57
56
56
56
56
54
53
49
48
42
41
28
20
19
5
