# Supplementary material for: Mayday sustains trans-synaptic BMP signaling required for synaptic maintenance with age
Source: eLife. 2021 Mar 5;10:e54932. doi: 10.7554/eLife.54932 (PMC7935490; doi:10.7554/eLife.54932)
Supplement: Figure 7—source data 1. [file elife-54932-fig7-data1.xlsx]

## Sheet: Figure 7 Cab45 Rescue
Figure 7: Cab45Rescue Flight Data							Total Branch Length (µM)						Number of Branches						Bouton Number
WT	Myd3PM71 (-/-)	Tub-Gal4 > Cab45, Myd3PM71 (-/-)	MHC-Gal4 > UAS-Cab45; Myd3PM71 (-/-)	Ok371-Gal4 & MHC-Gal4 > Cab45; Myd3PM71 (-/-)			WT	Tub-Gal4 > Cab45, Myd3PM71 (-/-)	MHC-Gal4 > UAS-Cab45; Myd3PM71 (-/-)	Ok371-Gal4 & MHC-Gal4 > Cab45; Myd3PM71 (-/-)	Myd3PM71 (-/-)		WT	Tub-Gal4 > Cab45, Myd3PM71 (-/-)	MHC-Gal4 > UAS-Cab45; Myd3PM71 (-/-)	Ok371-Gal4 & MHC-Gal4 > Cab45; Myd3PM71 (-/-)	Myd3PM71 (-/-)		WT	Tub-Gal4 > Cab45, Myd3PM71 (-/-)	MHC-Gal4 > UAS-Cab45; Myd3PM71 (-/-)	Ok371-Gal4 & MHC-Gal4 > Cab45; Myd3PM71 (-/-)	Myd3PM71 (-/-)
87	55	77	90	50			550.23	1155.18	575	2017.76	400.74		42	132	44	293	20		181	176	50	213	55
85	50	75	70	50			414.41	651.22	629.96	537.29	169.48		25	57	43	46	6		127	109	45	82	15
85	47	83	69	78			1026.92	1020.84	178.18	694.35	359.48		120	73	8	46	21		180	155	14	115	41
85	47	82	69	78			692.96	1438.24	364.38	688.91	287		47	182	20	52	18		158	232	37	120	29
85	43	74	60	49			548.47	1052.12	776.34	593.03	313.28		46	117	85	44	12		131	179	77	86	35
85	40	74	58	49			458.82	864.02	938.99	1289.98	131.85		34	94	90	121	4		124	135	80	195	18
85	36	73	58	47			700.87	914.58	1313.6	1589.64	308.86		46	106	132	189	13		153	137	118	246	42
83	29	73	53	43			568.44	1201.68	620.83	1111.35	224.51		51	145	57	122	10		107	147	51	107	32
83	26	82	52	77			768.99	971.72	406.5	1324.05	157.97		69	87	17	137	5		139	107	37	191	20
83	26	73	52	42			507.05	1065.06	708.75	613.66	344.14		46	97	54	58	20		156	161	86	54	56
81	26	72	50	77			384.72	1180.17	330.58	530.88	305.57		31	119	25	33	12		86	159	32	86	20
81	23	72	49	74			326.43	1029.94	400.79	1470.14	233.99		25	114	31	184	9		99	198	33	164	21
81	15	72	49	74			444.27	828.51	583.46	651.3	224.37		32	55	57	43	10		136	124	43	76	34
81	15	82	47	76			561.46	636.59	1198.66	1657	218.84		47	63	125	241	7		137	134	92	143	20
81	13	72	43	74			415.76	705.7	494.77	1476.37	110.29		29	56	22	171	2		113	124	49	165	18
81	5	72	41	72			614.02	681.74	1202.47	963.44	350.38		43	42	108	102	21		130	106	54	141	69
80	0	72	41	71			480.24	589.59	669.34	1843.25	260.6		31	46	55	235	13		116	96	63	256	30
80	0	71	40	71			404.9	827.17	281.87	808.93	274.92		23	64	14	92	12		69	159	26	125	37
80	0	71	38	69			333.89	1254.53	709.53	1413.27	382.91		25	106	54	167	24		100	180	107	154	87
80	0	70	35	69			456.33	1089.9	578.46	1480.66	367.03		32	117	38	174	19		99	201	52	173	42
78	0	70	35	69
78	0	70	34	69
78	0	81	33	75
78	0	70	31	69
78	0	70	27	63
76	0	70	21	63
76	0	81	19	73
76	0	81	18	73
76	0	70	15	63
74	0	70	13	62
74	0	70	13	62
74	0	69	13	62
74	0	69	10	62
74	0	81	0	73
74	0	81	0	67
71	0	80	0	67
71	0	80	0	64
71	0	79	0	63
71	0	79	0	63
69	0	79	0	63
69	0	79	0	63
69	0	77	0	61
69	0	77	0	61
58	0	77	0	61
45	0	77	0	59
23	0	77	0	59
21	0	77	0	59
0	0	77	0	57
0	0	77	0	56
		69	0	60
		69	0	60
		69	0	59
		69	0	59
		69	0	59
		68	0	59
		68	0	53
		67	0	51
		67	0	51
		67	0	47
		66	0	41
		66	0	24
		66	0	7
		66	0
		65	0
		65
		65
		65
		64
		64
		64
		64
		64
		64
		63
		62
		62
		61
		59
		58
		58
		58
		58
		58
		58
		57
		57
		57
		56
		56
		56
		55
		55
		54
		54
		54
		54
		54
		53
		53
		52
		52
		51
		49
		46
		46
		44
		44
		44
		43
		43
		43
		42
		42
		42
		40
		38
		38
		34
		26
		21
		14
		0
		0
		0
		0
		0
		0
		0
		0
		0
		0
		0
		0
		0
		0
		0
		0
