# Supplementary material for: Mayday sustains trans-synaptic BMP signaling required for synaptic maintenance with age
Source: eLife. 2021 Mar 5;10:e54932. doi: 10.7554/eLife.54932 (PMC7935490; doi:10.7554/eLife.54932)
Supplement: Figure 8—source data 1. [file elife-54932-fig8-data1.xlsx]

## Sheet: Figure 8 Gbb
Figure 8 E Data					Figure 8F Flight Data				Figure 8Panel G Gbb Colocalized Puncta
Gbb Puncta/ 10,000 µM2									Golgi-Gallt&Gbb		Rab5 & Gbb		Lamp-1 & Gbb
WT Day 3	Myd3PM71 Day 3	WT Day 25	Myd3PM71 Day 25		3PM71/+ Day 25	GbbD20/+ Day 25	GbbD20/+; 3PM71/+ Day 25		WT	Myd3PM71	WT	Myd3PM71	WT	Myd3PM71
39	63	454	390		83	74	81		1	2	1	1	0	2
40	153	522	1062		81	74	77		0	2	0	2	0	2
44	90	147	853		81	74	71		0	2	1	11	3	1
110	151	393	657		80	73	68		0	1	0	11	0	2
94	113	233	719		80	73	63		0	3	1	6	2	1
99	22	104	1489		80	73	59		0	3	1	5	0	1
27	145	81	224		80	71	57		0	6	0	8	1	1
21	105	221	453		78	69	56		0	1	1	2	0	1
65	159	109	311		77	69	54		0	7	2	5	0	0
72	101	72	366		77	67	53		0	2	0	4	0	0
					77	67	52
					76	66	52
					76	66	49
					76	66	48
					76	65	45
					76	65	43
					75	65	43
					75	62	42
					75	62	42
					75	60	37
					73	60	35
					73	57	18
					73	56	17
					73	56	10
					73	55	8
					72	55	0
					72	52	0
					72	47	0
					72	3	0
					72	0	0
					72	0	0
					71	0	0
					71	0	0
					71	0	0
					70	0	0
					70	81	0
					69	80	0
					68	80	0
					67	75	0
					64	69	0
					64	68	0
					64	67	0
					63	67	0
					63	65	0
					62	64	0
					62	64	0
					62	64	0
					62	64	0
					61	63	0
					61	63	0
					60	61	0
					60	61	0
					54	59	0
					38	59	0
						58	0
						57	0
						55
						54
						54
						52
						48
						18
						82
						82
						78
						78
						78
						75
						75
						75
						69
						69
						48
						35
