# Supplementary material for: Mayday sustains trans-synaptic BMP signaling required for synaptic maintenance with age
Source: eLife. 2021 Mar 5;10:e54932. doi: 10.7554/eLife.54932 (PMC7935490; doi:10.7554/eLife.54932)
Supplement: Figure 9—source data 1. [file elife-54932-fig9-data1.xlsx]

## Sheet: Figure 9 PreSynaptic Gbb
Panel M pMad+ Nuclei					Panel R % pMad/Muscle Area						Panel S: Flight Data				Panel T: Flight Data						Panel U: Flight Data				Panel V Flight Data
Day 3 WT	Day 3Myd	Day 21 WT	Day 21 Myd		Day 3 WT	Day 3Myd	Day 21 WT	Day 21 Myd			Myd3PM71/+	WitB11/+	WitB11/+ ,Myd3PM71/+		Myd3PM71/+	Tkv7/+	Tkv7/+;Myd3PM71/+	Tkv8/+	Tkv8/+;Myd3PM71/+		Myd3PM71/+	Mad1-2/+	Mad1-2/+; Myd3PM71/+		Day 3 Tkv-CA, Myd3PM71/+	Day 3 Tkv-CA/+,Myd3PM71 (-/-)	Day 3 Ok371-Gal4>TkvCA, Myd3PM71 (-/-)		Day 28 Tkv-CA, Myd3PM71/+	Day 28 Tkv-CA/+,Myd3PM71 (-/-)	Day 28 Ok371-Gal4>TkvCA, Myd3PM71 (-/-)
67	91	55	37		0.251865	0.13361	0.117302	4.45414			90	82	69		86	84	59	90	0		83	90	86		90	87	81		83	9	0
82	80	74	39		0.322437	0.096512	0.273037	0.771713			87	80	69		86	80	58	77	0		83	90	80		82	85	81		83	10	6
88	82	58	27		0.506878	0.501633	0.162029	1.8836			82	78	65		83	80	36	75	0		82	83	78		79	83	79		83	12	50
76	63	75	46		0.109291	0.050735	0.491238	1.41821			82	76	63		82	75	32	75	0		78	83	77		79	82	79		81	28	53
74	59	91	46		0.54884	0.350475	0.568581	1.84488			82	76	60		81	74	15	73	0		78	83	77		79	82	77		81	33	53
75	70	88	45		0.130749	0.426674	0.300217	2.85368			81	75	60		81	73	11	73	0		78	82	76		79	82	77		77	49	53
50	51	69	26		0.269604	0.294018	0.263309	3.14875			80	74	58		79	72	8	71	0		78	80	76		79	81	77		77	52	53
59	46	55	19		0.100708	0.123215	0.223351	3.04966			80	71	58		79	67	4	70	0		78	80	75		77	81	77		76	64	58
63	59	50	39		0.498772	0.068283	0.383377	1.77832			80	71	54		79	65	4	70	0		78	80	75		77	81	77		76	65	60
44	60	55	17		0.290966	0.88253	0.549603	1.40171			80	71	54		79	65	0	68	0		78	80	74		77	81	76		76	67	62
48	46	39	18								80	70	52		79	64	0	68	0		77	78	74		75	79	76		76	70	62
63	53	32	13								79	69	50		78	61	0	68	0		77	78	71		75	78	75		74	70	62
											78	69	46		78	61	0	67	0		77	78	70		75	78	75		74	70	62
											78	67	46		78	57	0	65	0		76	78	70		74	75	74		74	70	62
											78	67	45		78	54	0	62	0		76	76	70		74	75	74		74	79	63
											77	66	38		78	51	0	62	0		76	76	70		72	75	73		74	79	63
											77	65	31		78	49	0	62	0		76	75	62		72	75	71		73	0	65
											77	65	29		77	49	0	57	0		75	75	58		68	74	70		70	0	66
											76	64	22		77	82	0	47	0		75	75	57		68	74	70		70	0	66
											76	64	18		77	79	0	0	0		75	72	50		68	72	70		70	0	67
											75	63	8		77	79	0	87	0		75	72	0		68	72	68		70	0	67
											75	61	0		77	74	0	82	0		74	72	0		68	71	68		69	0	67
											75	59	0		77	74	0	81	0		74	72	0		68	66	66		69	0	69
											75	59	0		76	74	0	81	79		74	71	0		64	64	66		68	0	71
											75	58	0		76	71	0	81	78		74	71	0		63	60	66		68	0	71
											75	54	0		76	68	0	79	74		74	70	0		61		64		67	0	72
											73	51	0		75		0	79	74		73	69	0		45		64		66	0	72
											72	51	0		75		86	78	74		73	69	0				62		66	0	72
											72	48	0		75		79	78	72		73	69	0				61		66	0	72
											72	47	0		75		78	77	72		72	69	0				59		66	0	73
											71		0		75		78	75	71		72	68	0				54		66	0	74
											71		0		75		74	75	71		72	67	0				54		64	0	74
											70		0		74		74	75	70		72	67	0				54		62	0	74
											70		0		74		72	75	69		70	67	0				53		62	0	74
											69				74		72	73	69		70	67	0						62	0	75
											69				74		72	72	65		70	67	0						61	0	76
											68				74		70	72	54		69	67	0						60	0	76
											67				73		70	72	54		67	67	0						57	0	77
											67				73		68	70	53		67	67	0						54	0	78
											66				73		68	67	51		64	67	0						49	0	74
											66				73		66	66	45		63	66	0						47	0	74
											66				73		67	63	43		63	66	0							0	74
											66				73		25	63	37		58	66	0							0	80
											66				73		14	61	33		47	64	0							0	81
											65				72		0	61	28			64	0							0
											63				72		0	61	22			63	0							0
											63				72		0	61	20			63	0
											62				72		0	61	12			62	0
											62				72		0	61	0			62
											62				71		0	59	0			62
											60				71		0	59	0			62
											59				71		0	54	0			62
											59				71		0	54	0			61
											59				71		0		0			60
											47				71		0		0			58
															71		0		0			58
															71		0		0			57
															71		0		82			56
															71		0		71			55
															71		0		71			52
															70		0		26			51
															70		0		16			50
															70		5		14			46
															70		11		90			0
															70		23		0			0
															69		23		0
															69		43		0
															69		43		0
															68		48		0
															68		49		0
															68		52		7
															68		57		17
															68		60		20
															68		60		27
															68		64		27
															68		64		33
															67		66		74
															67		66		84
															67		66		86
															67		67
															67		68
															67		69
															67		69
															67		72
															66		74
															66		78
															66		78
															66		80
															66		82
															66		82
															66		85
															66
															65
															65
															65
															65
															65
															64
															64
															64
															64
															64
															63
															63
															63
															63
															63
															63
															63
															62
															62
															62
															61
															61
															61
															61
															60
															60
															60
															59
															59
															59
															58
															58
															58
															58
															56
															56
															56
															56
															55
															55
															53
															53
															51
															51
															48
															0
															0
															0
															0
															0
