# Supplementary material for: Mayday sustains trans-synaptic BMP signaling required for synaptic maintenance with age
Source: eLife. 2021 Mar 5;10:e54932. doi: 10.7554/eLife.54932 (PMC7935490; doi:10.7554/eLife.54932)
Supplement: Figure 10—source data 1. [file elife-54932-fig10-data1.xlsx]

## Sheet: Figure 10 TUNEL
Panel G: TG Tunel + Nuclei Day 25				Panel N: % DLM Tunel Positive Nuclei Day 28
WT	Myd3PM71			WT	Myd3PM71
1	18			0	83.3
2	24			38.46	100
4	36			0	90
0	22			0	100
1	32			0	91.7
2	33			0	80
1	29			0	87.5
3	38			0	100
1	18			0	100
2	29			0	88.9
3	31
1	20
