# Supplementary material for: Mayday sustains trans-synaptic BMP signaling required for synaptic maintenance with age
Source: eLife. 2021 Mar 5;10:e54932. doi: 10.7554/eLife.54932 (PMC7935490; doi:10.7554/eLife.54932)
Supplement: Supplementary file 1. [file elife-54932-supp1.xlsx]

## Sheet: Table 1
	Table 1. Mayday is required in postsynaptic muscle tissue.
	Genotype	Age	Average Landing Height (cm)	Sample Size (n)
	UAS-Myd RNAi; UAS DICER 2 /+	3	76.2	85
	UAS-Myd RNAi; UAS DICER 2 /+	14	78.8	41
	UAS-Myd RNAi; UAS DICER 2 /+	21	73.1	135
	Tubulin Gal4/+	3	67.1	60
	Tubulin Gal4/+	14	64.4	42
	Tubulin Gal4/+	21	69.6	57
	Elav-Gal4/+	3	76.9	42
	Elav-Gal4/+	4	70.2	72
	Elav-Gal4/+	21	71.3	86
	Elav-Gal4 > Myd RNAi	3	73.1	59
	Elav-Gal4 > Myd RNAi	14	72.8	95
	Elav-Gal4 > Myd RNAi	21	69.7	96
	OK371-Gal4/+	3	69.5	108
	OK371-Gal4/+	14	68.5	40
	OK371-Gal4/+	21	70.6	59
	OK371-Gal4 > Myd RNAi	3	73.1	56
	OK371-Gal4 > Myd RNAi	14	71.2	61
	OK371-Gal4 > Myd RNAi	21	71.5	53
	Repo-Gal4/+	3	75.7	69
	Repo-Gal4/+	14	71.4	37
	Repo-Gal4/+	21	70.6	37
	Repo-Gal4 > Myd RNAi	3	76.1	45
	Repo-Gal4 > Myd RNAi	14	71.9	58
	Repo-Gal4 > Myd RNAi	21	76.3	103
	MHC-Gal4/+	3	68.8	46
	MHC-Gal4/+	14	69.2	38
	MHC-Gal4/+	21	65.1	82
	MHC-Gal4 > Myd RNAi	3	58.6	70
	MHC-Gal4 > Myd RNAi	14	38.2	63
	MHC-Gal4 > Myd RNAi	21	21.1	96
