# Supplementary material for: Mayday sustains trans-synaptic BMP signaling required for synaptic maintenance with age
Source: eLife. 2021 Mar 5;10:e54932. doi: 10.7554/eLife.54932 (PMC7935490; doi:10.7554/eLife.54932)
Supplement: Supplementary file 2. [file elife-54932-supp2.xlsx]

## Sheet: Table 2
	Table 2. Myd3PM71 Pre-synaptic BMP Pathway Genetic Interactions Data .
	Genotype	Age	Average Landing Height (cm)	Sample Size (n)
	Myd3PM71/+	28	71.8	55
	WitB11/+	28	65.7	30
	WitB11/+ ,Myd3PM71/+	28	29.6	34
	Myd3PM71/+	28	66.1	142
	Tkv7/+	28	68.5	26
	Tkv7/+;Myd3PM71/+	28	33.7	91
	Tkv8/+	28	68.2	53
	Tkv8/+;Myd3PM71/+	28	27	79
	Myd3PM71/+	28	73.1	44
	Mad1-2/+	28	66.7	65
	Mad1-2/+; Myd3PM71/+	28	29.7	48
	Tkv-CA, Myd3PM71/+	3	72.4	27
	Tkv-CA/+,Myd3PM71 (-/-)	3	76.5	25
	Ok371-Gal4>TkvCA, Myd3PM71 (-/-)	3	69.7	34
	Tkv-CA, Myd3PM71/+	28	69.3	41
	Tkv-CA/+,Myd3PM71 (-/-)	28	17.9	46
	Ok371-Gal4>TkvCA, Myd3PM71 (-/-)	28	64.9	44
